# Supplementary material
Source: MDPI journal article supplement (https://www.mdpi.com/2073-4395/11/2/368)
Supplement: s1 [file s1]

## Supplementary materials

**Table S1.** Experiment description of all inter- and mono-cropped trials. ‘L’, ‘H’, ‘M’, and ‘N’, respectively denote low, high, moderate and no shade. ‘M’ denotes mono-crop.

| Site     | Planting<br>dates<br>(seasons) | Shade<br>level | Mean<br>PAR<br>(micro<br>mole<br>m s <sup>-1</sup> ) | Banana           |                | Bush beans               |                      |                 | Climbing bean         |                      |                 | Amaranth              |                      |                 |
|----------|--------------------------------|----------------|------------------------------------------------------|------------------|----------------|--------------------------|----------------------|-----------------|-----------------------|----------------------|-----------------|-----------------------|----------------------|-----------------|
|          |                                |                |                                                      | Plot size<br>(m) | Spacing<br>(m) | Full<br>plot<br>size (m) | Net plot<br>size (m) | Spacing<br>(cm) | Full plot<br>size (m) | Net plot<br>size (m) | Spacing<br>(cm) | Full plot<br>size (m) | Net plot<br>size (m) | Spacing<br>(cm) |
| Katana 1 | September<br>2014              | L              | 1,267                                                | 18 x 8           | 2 x2           | 2.5 x 6                  | 1.5 x 5.6            | 50 x 20         | 2.5 x 6               | 1.5 x 5.5            | 50 x 25         | 2.5 x 6               | 1.5 x 5.7            | 50 x 15         |
|          |                                | L              | 1,463                                                | 27 x 8           | 2x3            | 2.5 x 6                  | 1.5 x 5.6            | 50 x 20         | 2.5 x 6               | 1.5 x 5.5            | 50 x 25         | 2.5 x 6               | 1.5 x 5.7            | 50 x 15         |
|          |                                | L              | 1,529                                                | 27 x 12          | 3x3            | 2.5 x 6                  | 1.5 x 5.6            | 50 x 20         | 2.5 x 6               | 1.5 x 5.5            | 50 x 25         | 2.5 x 6               | 1.5 x 5.7            | 50 x 15         |
|          | March<br>2015                  | H              | 228                                                  | 18 x 8           | 2 x2           | 2.5 x 6                  | 1.5 x 5.6            | 50 x 20         | 2.5 x 6               | 1.5 x 5.5            | 50 x 25         | 2.5 x 6               | 1.5 x 5.7            | 50 x 15         |
|          |                                | H              | 392                                                  | 27 x 8           | 2x3            | 2.5 x 6                  | 1.5 x 5.6            | 50 x 20         | 2.5 x 6               | 1.5 x 5.5            | 50 x 25         | 2.5 x 6               | 1.5 x 5.7            | 50 x 15         |
|          |                                | H              | 501                                                  | 27 x 12          | 3x3            | 2.5 x 6                  | 1.5 x 5.6            | 50 x 20         | 2.5 x 6               | 1.5 x 5.5            | 50 x 25         | 2.5 x 6               | 1.5 x 5.7            | 50 x 15         |
|          |                                | N              | 1,739                                                | 26.5 x 19        | M              | 2.5 x 6                  | 1.5 x 5.6            | 50 x 20         | 2.5 x 6               | 1.5 x 5.5            | 50 x 25         | 2.5 x 6               | 1.5 x 5.7            | 50 x 15         |
|          | September<br>2015              | H              | 168                                                  | 18 x 8           | 2 x2           | 2.5 x 6                  | 1.5 x 5.6            | 50 x 20         | 2.5 x 6               | 1.5 x 5.5            | 50 x 25         | 2.5 x 6               | 1.5 x 5.7            | 50 x 15         |
|          |                                | H              | 273                                                  | 27 x 8           | 2x3            | 2.5 x 6                  | 1.5 x 5.6            | 50 x 20         | 2.5 x 6               | 1.5 x 5.5            | 50 x 25         | 2.5 x 6               | 1.5 x 5.7            | 50 x 15         |
|          |                                | H              | 259                                                  | 27 x 12          | 3 x3           | 2.5 x 6                  | 1.5 x 5.6            | 50 x 20         | 2.5 x 6               | 1.5 x 5.5            | 50 x 25         | 2.5 x 6               | 1.5 x 5.7            | 50 x 15         |
|          |                                | N              | 1,700                                                | 26.5 x 19        | M              | 2.5 x 6                  | 1.5 x 5.6            | 50 x 20         | 2.5 x 6               | 1.5 x 5.5            | 50 x 25         | 2.5 x 6               | 1.5 x 5.7            | 50 x 15         |
| Katana 2 | September<br>2015              | H              | 390                                                  | 36 x 9           | 4 x 3          | 10.5 x 12                | 9.5 x 11.6           | 50 x 20         | 10.5 x 12             | 9.5 x11.5            | 50 x 25         | 10.5 x 12             | 9.5 x 11.7           | 50 x 15         |
|          |                                | N              | 1,700                                                | 26.5 x 19        | M              | 2.5 x 6                  | 1.5 x 5.6            | 50 x 20         | 2.5 x 6               | 1.5 x 5.5            | 50 x 25         | 2.5 x 6               | 1.5 x 5.7            | 50 x 15         |
|          | March<br>2016                  | H              | 301                                                  | 36 x 9           | 4 x 3          | 10.5 x 12                | 9.5 x 11.6           | 50 x 20         | 10.5 x 12             | 9.5 x11.5            | 50 x 25         | 10.5 x 12             | 9.5 x 11.7           | 50 x 15         |
|          |                                | N              | 1,806                                                | 26.5 x 19        | M              | 2.5 x 6                  | 1.5 x 5.6            | 50 x 20         | 2.5 x 6               | 1.5 x 5.5            | 50 x 25         | 2.5 x 6               | 1.5 x 5.7            | 50 x 15         |
| Kavumu   | March<br>2015                  | M              | 813                                                  | 45 x 22          | 4 x 3          | 2 x 4                    | 1.5 x 3.6            | 50 x 20         | 2 x 4                 | 1.5 x 3.5            | 50 x 25         | 2 x 4                 | 1.5 x 3.7            | 50 x 15         |
|          |                                | N              | 1,898                                                | 45 x 22          | M              | 2 x 4                    | 1.5 x 3.6            | 50 x 20         | 2 x 4                 | 1.5 x 3.5            | 50 x 25         | 2 x 4                 | 1.5 x 3.7            | 50 x 15         |
|          | September<br>2015              | M              | 640                                                  | 45 x 22          | 4 x 3          | 2 x 4                    | 1.5 x 3.6            | 50 x 20         | 2 x 4                 | 1.5 x 3.5            | 50 x 25         | 2 x 4                 | 1.5 x 3.7            | 50 x 15         |
|          |                                | N              | 1,827                                                | 45 x 22          | M              | 2 x 4                    | 1.5 x 3.6            | 50 x 20         | 2 x 4                 | 1.5 x 3.5            | 50 x 25         | 2 x 4                 | 1.5 x 3.7            | 50 x 15         |
|          | March<br>2016                  | M              | 663                                                  | 45 x 22          | 4 x 3          | 2 x 4                    | 1.5 x 3.6            | 50 x 20         | 2 x 4                 | 1.5 x 3.5            | 50 x 25         | 2 x 4                 | 1.5 x 3.7            | 50 x 15         |
|          |                                | N              | 1,756                                                | 45 x 22          | M              | 2 x 4                    | 1.5 x 3.6            | 50 x 20         | 2 x 4                 | 1.5 x 3.5            | 50 x 25         | 2 x 4                 | 1.5 x 3.7            | 50 x 15         |
|          |                                | M              | 601                                                  | 45 x 22          | 4 x 3          | 2 x 4                    | 1.5 x 3.6            | 50 x 20         | 2 x 4                 | 1.5 x 3.5            | 50 x 25         | 2 x 4                 | 1.5 x 3.7            | 50 x 15         |

|                        |                   |   |       |         |       |        |           |         |        |           |         |        |           |         |
|------------------------|-------------------|---|-------|---------|-------|--------|-----------|---------|--------|-----------|---------|--------|-----------|---------|
|                        | September<br>2016 | N | 1896  | 45 x 22 | M     | 2 x 4  | 1.5 x 3.6 | 50 x 20 | 2 x 4  | 1.5 x 3.5 | 50 x 25 | 2 x 4  | 1.5 x 3.7 | 50 x 15 |
|                        | March<br>2017     | H | 429   | 20 x 23 | 2 x 2 | 7 x 6  | 6.6 x 5   | 50 x 20 | NA     | NA        | 50 x 25 | NA     | NA        | 50 x 15 |
|                        |                   | M | 779   | 20 x 23 | 4 x 4 | 7 x 6  | 6.6 x 5   | 50 x 20 | NA     | NA        | 50 x 25 | NA     | NA        | 50 x 15 |
|                        |                   | N | 1,749 | 20 x 23 | M     | 7 x 6  | 6.6 x 5   | 50 x 20 | NA     | NA        | 50 x 25 | NA     | NA        | 50 x 15 |
| INERA-<br>Mulungu<br>2 | September<br>2017 | H | 445   | 20 x 23 | 2 x 2 | 7 x 6  | 6.6 x 5   | 50 x 20 | NA     | NA        | 50 x 25 | NA     | NA        | 50 x 15 |
|                        |                   | M | 833   | 20 x 23 | 4 x 4 | 7 x 6  | 6.6 x 5   | 50 x 20 | NA     | NA        | 50 x 25 | NA     | NA        | 50 x 15 |
|                        |                   | N | 1,795 | 20 x 23 | M     | 7 x 6  | 6.6 x 5   | 50 x 20 | NA     | NA        | 50 x 25 | NA     | NA        | 50 x 15 |
|                        | March<br>2018     | M | 694   | 20 x 23 | 2 x 2 | 7 x 6  | 6.6 x 5   | 50 x 20 | NA     | NA        | 50 x 25 | NA     | NA        | 50 x 15 |
|                        |                   | M | 994   | 20 x 23 | 4 x 4 | 7 x 6  | 6.6 x 5   |         | NA     | NA        | 50 x 25 | NA     | NA        | 50 x 15 |
|                        |                   | N | 1,799 | 20 x 23 | M     | 7 x 6  | 6.6 x 5   | 50 x 20 | NA     | NA        | 50 x 25 | NA     | NA        | 50 x 15 |
|                        |                   |   |       |         |       |        |           |         |        |           |         |        |           |         |
| INERA-<br>Mulungu<br>1 | March<br>2016     | L | 1,092 | 63 x 12 | 4 x 3 | 12 x 6 | 11.6 x 5  | 50 x 20 | 12 x 6 | 11.5 x 5  | 50 x 25 | 12 x 6 | 11.5 x 7  | 50 x 15 |
|                        | September<br>2016 | H | 415   | 63 x 12 | 4 x 3 | 12 x 6 | 11.6 x 5  | 50 x 20 | 12 x 6 | 11.5 x 5  | 50 x 25 | 12 x 6 | 11.5 x 7  | 50 x 15 |

**Table S2.** The regression ( $R^2$ ) values between Photosynthetically Active Radiation (PAR) with i) grain yields and ii) biomass yields of bush and climbing beans.

| Site/<br>experiment            | Cropping<br>season | Planting density                                  | Grain yield  |               | Biomass yield |               |
|--------------------------------|--------------------|---------------------------------------------------|--------------|---------------|---------------|---------------|
|                                |                    |                                                   | $R^2$ (Fpr)  |               | $R^2$ (Fpr)   |               |
|                                |                    |                                                   | Bush bean    | Climbing bean | Bush bean     | Climbing bean |
| Katana trial<br>1              | Sept. 2014         | 2x2, 2x3, 3x3m; no monocrop                       | 0.18 (0.650) | 0.38 (0.310)  | 0.07 (0.865)  | 0.12 (0.759)  |
|                                | Feb. 2015          | 2x2, 2x3, 3x3m; with monocrop                     | 0.53 (0.078) | 0.63 (0.030)  | 0.79 (0.002)  | 0.54 (0.071)  |
|                                | Sept. 2015         | 2x2, 2x3, 3x3m; with monocrop                     | 0.98 (0.000) | 0.94 (0.000)  | 0.96 (0.000)  | 0.96 (0.000)  |
|                                | All seasons        | 2x2m across seasons 1, 2 and 3; no monocrop       | 0.67 (0.050) | 0.92 (0.000)  | 0.83 (0.006)  | 0.81 (0.008)  |
|                                | All seasons        | 2x3m across seasons 1, 2 and 3; no monocrop       | 0.79 (0.010) | 0.84 (0.005)  | 0.81 (0.008)  | 0.44 (0.238)  |
|                                | All seasons        | 3x3m across seasons 1, 2 and 3; no monocrop       | 0.94 (0.000) | 0.93 (0.000)  | 0.82 (0.007)  | 0.41 (0.264)  |
| Katana trial<br>2 (mixed plot) | All seasons        | 3x4m across seasons 1 and 2; no monocrop          | 0.68 (0.140) | 0.60 (0.290)  | 0.94(0.006)   | 0.50 (0.391)  |
| Kavumu                         | All seasons        | 3x4m across seasons 1, 2, 3, and 4; with monocrop | 0.18 (0.320) | 0.27 (0.150)  | 0.39 (0.029)  | 0.28 (0.138)  |
| Mulungu                        | March 2017         | 2x2m, 4x4m, with monocrop                         | 0.79 (0.010) | NA            | 0.91 (0.000)  | NA            |
|                                | Sept. 2017         | 2x2m, 4x4m, with monocrop                         | 0.92 (0.004) | NA            | 0.78 (0.012)  | NA            |
|                                | March 2018         | 2x2m, 4x4m, with monocrop                         | 0.90 (0.001) | NA            | 0.84 (0.005)  | NA            |
|                                | All seasons        | 2x2m across seasons 1, 2, 3; with monocrop        | 0.64 (0.004) | NA            | 0.49 (0.40)   | NA            |
|                                | All seasons        | 4x4m across seasons 1, 2, 3 and monocrop          | 0.5 (0.030)  | NA            | 0.21 (0.413)  | NA            |
|                                | All seasons        | 3x4m season 1, 3x4m season 2; no monocrop         | 0.69 (0.13)  | 0.96 (0.002)  | 0.65 (0.163)  | 0.84 (0.036)  |

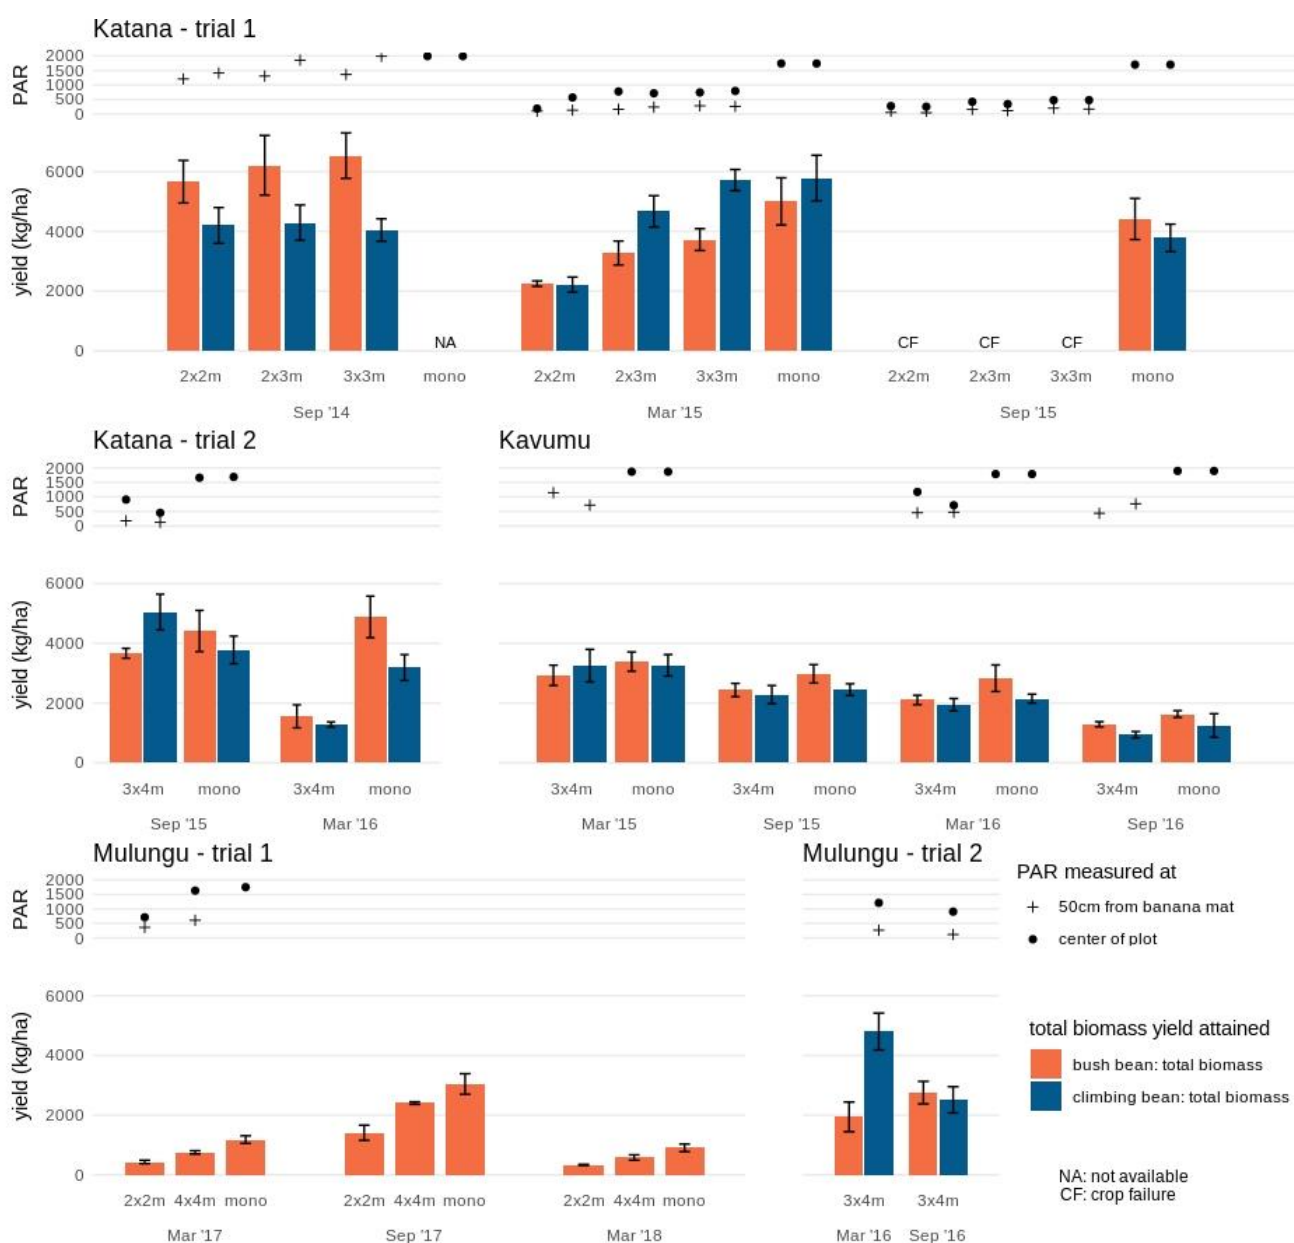

**Figure S1.** Crop performance of bush bean and climbing bean in various intercrop formations and monocrops at the study sites Katana, Kavumu and Mulungu. The total aboveground biomass yield represents the sum of the grain and non-edible aboveground yield, and is indicated separately for bush bean (orange) and climbing bean (blue) at each intercrop formation and cropping season. At Katana, the crop failure (CF) in September 2015 is indicated. The annual crop in monocrop formation is not assessed (NA) at Katana in September 2014 and not available in trial 2 at Mulungu. Photosynthetic active radiation (PAR) measured at the center of the plot (full circle) and 50cm from the banana mat (cross) is indicated for each annual intercrop and monocrop. Note that during some stages of the experimental trial PAR measurements are not available due to temporary equipment defects.

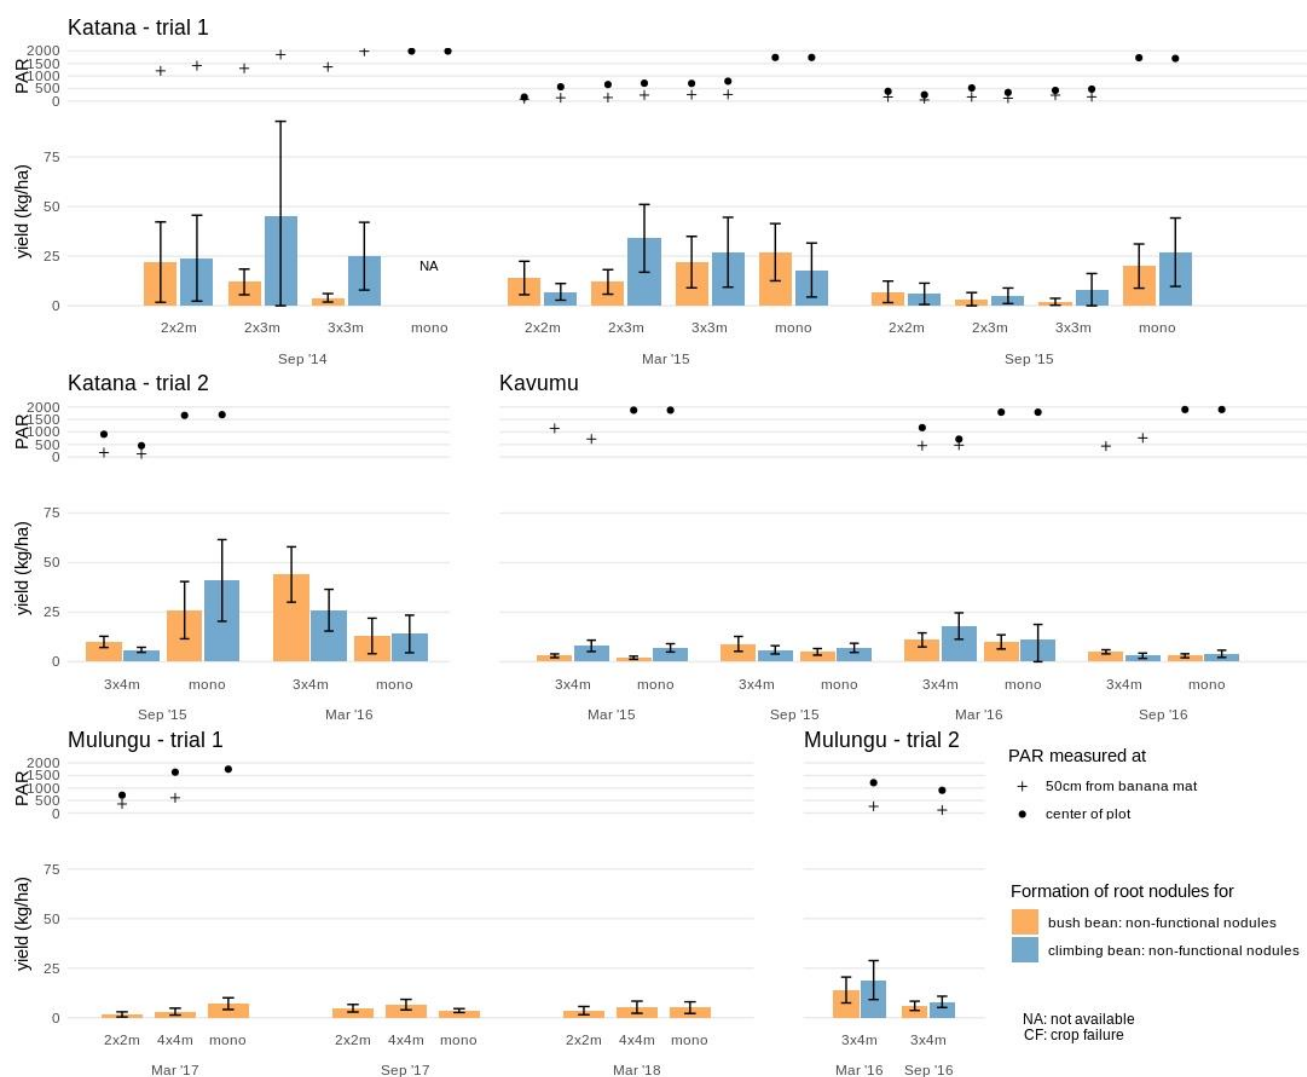

**Figure S2.** Root nodule formation of bush bean and climbing bean in various intercrop formations and monocrops at the study sites Katana, Kavumu and Mulungu. Non-functional root nodules are presented for bush bean (orange) and climbing bean (blue) at each intercrop formation and cropping season. The annual crop in monocrop formation is not assessed (NA) at Katana in September 2014 and not available in trial 2 at Mulungu. Photosynthetic active radiation (PAR) measured at the center of the plot (full circle) and 50cm from the banana mat (cross) is indicated for each annual intercrop and monocrop. Note that during some stages of the experimental trial PAR measurements are not available due to temporary equipment defects.

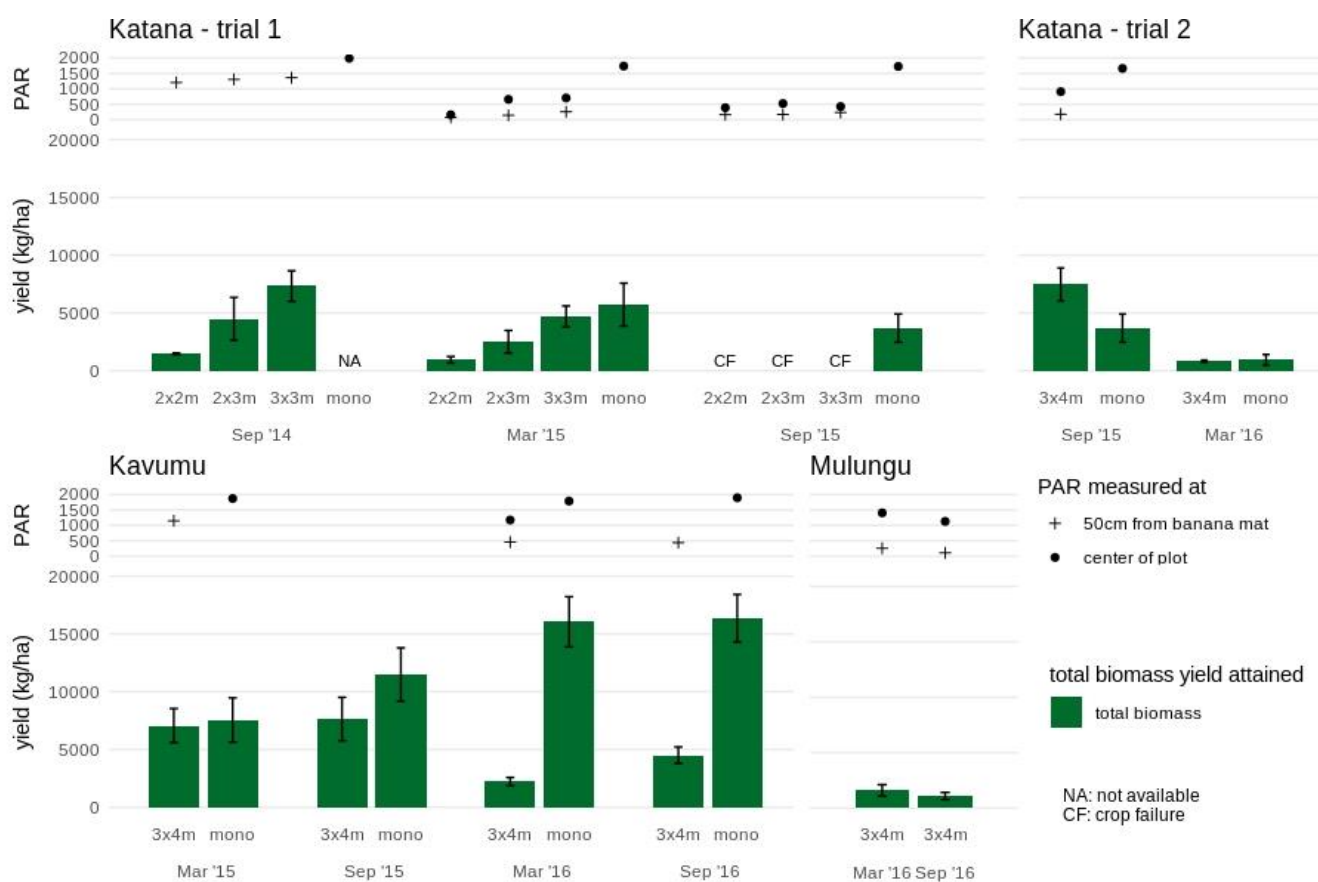

**Figure S3.** Crop performance of amaranth in various intercrop formations and monocrops at the study sites Katana, Kavumu and Mulungu. The total aboveground biomass yield represents the sum of the edible and non-edible aboveground biomass. All yields are indicated for each intercrop formation and cropping season. At Katana, the crop failure (CF) in September 2015 is indicated. The annual crop in monocrop formation is not assessed (NA) at Katana in September 2014 and not available in trial 2 at Mulungu. Photosynthetic active radiation (PAR) measured at the center of the plot (full circle) and 50cm from the banana mat (cross) is indicated for each annual intercrop and monocrop. Note that during some stages of the experimental trial PAR measurements are not available due to temporary equipment defects.
